# Supplementary material for: A photocrosslinked hybrid hydrogel based on chitosan/hyaluronic acid/ZnO toward wound sealing
Source: Royal Society of Chemistry journal article supplement (doi:10.1039/d4py01207k), 2024-12-20
Supplement: d4py01207k1.pdf [file d4py01207k1.pdf]

## Electronic Supplementary Information

### Photocrosslinked Hybrid Hydrogel Based on Chitosan/Hyaluronic Acid /ZnO toward Wound Sealing

Jiale Sun,<sup>a†</sup> Donghao Hu,<sup>b†</sup> Yiling Li,<sup>b</sup> Jia Wei<sup>a\*</sup> and Yanlei Yu<sup>a\*</sup>

<sup>a</sup>Department of Materials Science and State Key Laboratory of Molecular Engineering of Polymers, Fudan University, Shanghai 200433, China

<sup>b</sup>Department of Chemistry and State Key Laboratory of Molecular Engineering of Polymers, Fudan University, Shanghai 200433, China

<sup>†</sup>These authors contributed equally to this work.

#### 1. Synthesis and characterization

**Synthesis of QCS:** Chitosan (CS, 2.5 g) was dissolved in 100 mL of isopropanol, and the pH was adjusted to 8~9 by 1 wt% NaOH followed by the addition of glycidyl trimethyl ammonium chloride (GTA). The mixture was stirred at 60°C for 24 h, then dialyzed for 3 days to remove unreacted GTA, and finally freeze-dried for another 3 days to yield quaternized chitosan (QCS).

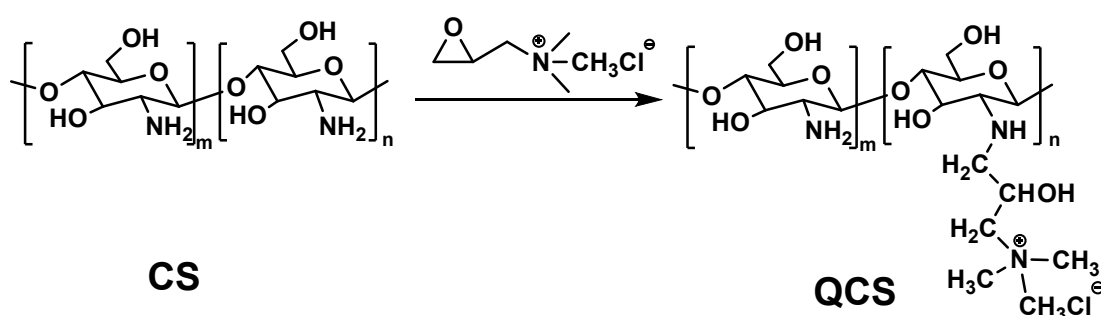

**Scheme. S1** Synthetic route of QCS.

The degree of quaternization (*DQ*) of QCS was determined to be 67.2 % by the analytical method using 8% K<sub>2</sub>CrO<sub>4</sub> as the indicator. To perform the titration, 1 mL of the indicator was added to the QCS solution, followed by slow titration with 0.05 mol/L silver nitrate solution. The endpoint of the titration was marked by the solution turning brick red.

$$DQ = \frac{V \cdot C \cdot 10^{-3}}{V \cdot C \cdot 10^{-3} + (W - V \cdot C \cdot MW_1 \cdot 10^{-3}) / MW_2} \times 100\% \quad (\text{Eq.S1})$$

where,  $V$  (mL) represents the volume of the  $\text{AgNO}_3$  aqueous solution required to reach the inflection point,  $C$  (mol/L) is the  $\text{AgNO}_3$  aqueous solution concentration,  $W$  (g) is the weight of the QSC sample,  $MW_1$  is the molecular mass of quaternary glucosamine (314 g/mol),  $MW_2$  is the molecular mass of glucosamine (162 g/mol), respectively.

**Synthesis of NS:** 2-Nitrobenzyl alcohol (10 mmol) was dissolved in dichloromethane (10 mL), and  $\text{PBr}_3$  (1.2 mL) was added under an ice-water bath. The mixture was stirred for 60 min, then diluted with 10 mL dichloromethane and washed with deionized water. The aqueous phase was extracted with dichloromethane, and the combined organic phases were collected. The brown solid product o-nitrobenzyl bromide, was isolated using column chromatography. (1.48 g, yield of 68.5%). 2-Aminoethanethiol (5.5 mmol) was dissolved in deionized water (15 mL) and triethylamine (0.7 mL) was added to the solution. The mixture was cooled to  $0^\circ\text{C}$ , and then o-nitrobenzyl bromide (5 mmol, dissolved in 15 mL  $\text{CH}_3\text{OH}$ ) was slowly added dropwise to the flask. The mixture was stirred at  $0^\circ\text{C}$  for 30 min, followed by stirring at  $25^\circ\text{C}$  for an additional 30 min. The organic phase was separated, dried, and purified by column chromatography to yield a yellow oily product, NS (0.65 g, 61.2% yield).

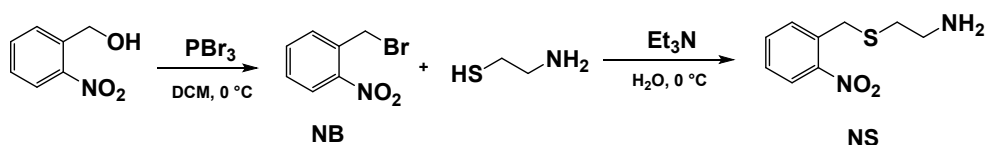

**Scheme. S2** Synthetic route of photocage NS.

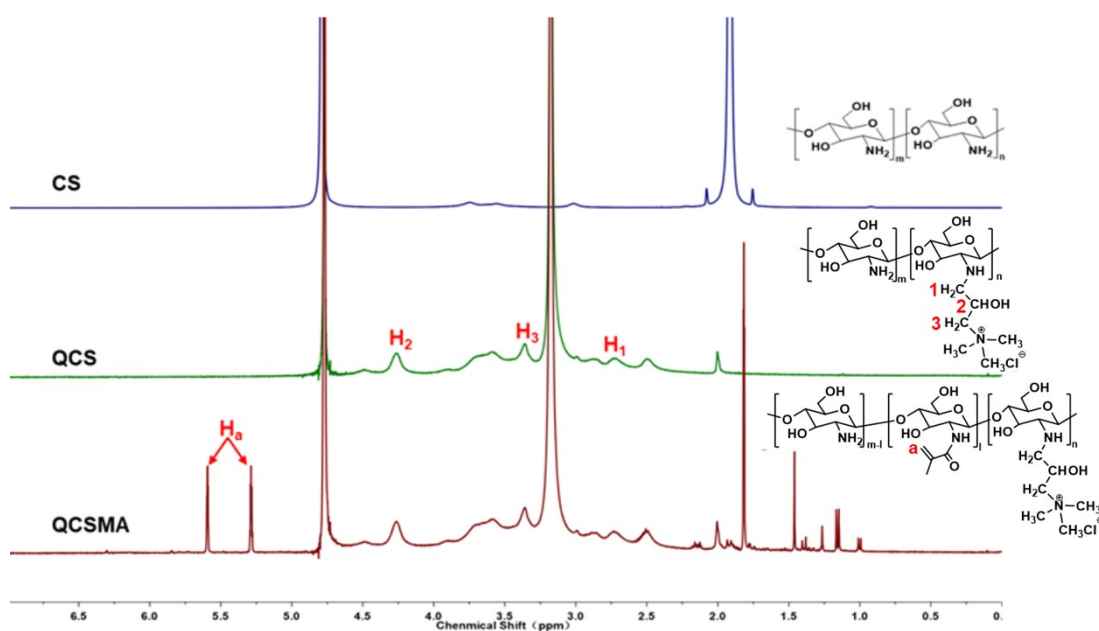

**Fig. S1**  $^1\text{H}$  NMR spectra of CS, QCS, and QCSMA.

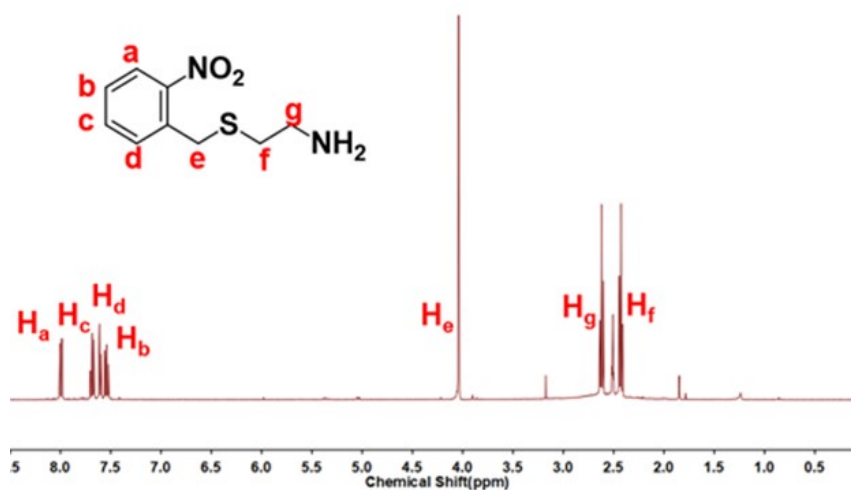

**Fig. S2**  $^1\text{H}$  NMR spectrum of NS.

$$\text{Degree of NS (DN)} = \frac{3I_a}{I_b} \times 100\% \quad (\text{Eq.S2})$$

where  $I_a$  represents the integral of the peaks corresponding to the protons of the NS group, and  $I_b$  represents the integral of the reference peak, the degree of substitution was determined to be 19.5%.

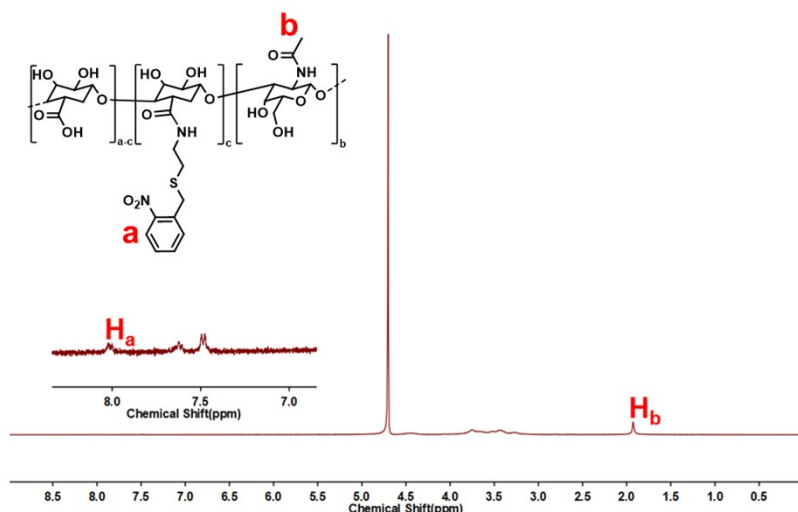

**Fig. S3** <sup>1</sup>H NMR spectrum of HANS.

## 2. Results and Discussions

In order to investigate the reason for the decrease in the strength of the hydrogel after the addition of ZnO, we measured the UV-vis absorption spectra of ZnO and LAP, respectively, and it was assumed that the decrease in the strength of the hydrogel was due to the competition between the absorption of ZnO and the photoinitiator at 365 nm.

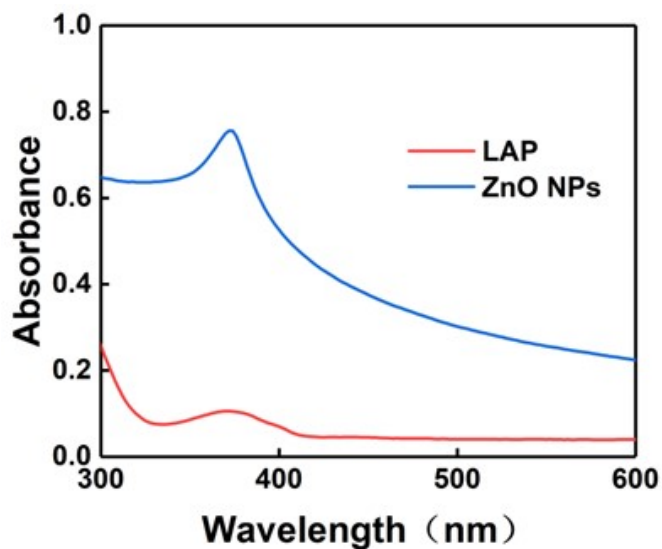

**Fig. S4** UV-vis absorption spectra of photoinitiator LAP and ZnO NPs.

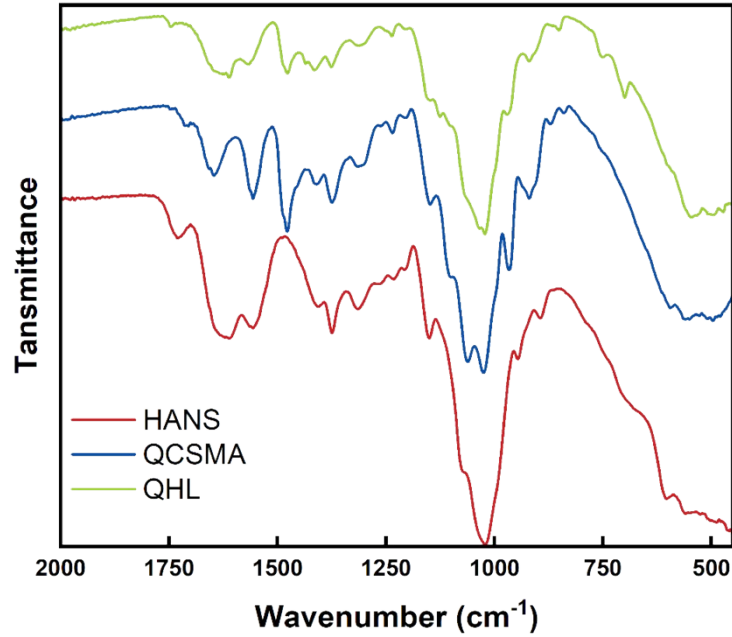

**Fig. S5** FTIR spectra of HANS, QCSMA and QHL hydrogels.

The peaks at 1700 and 841  $\text{cm}^{-1}$ , corresponding to the C=C bond, disappeared following photocrosslinking, confirming the successful formation of the hydrogel network. Furthermore, new weak peaks at 699 and 545  $\text{cm}^{-1}$  emerged, which can be attributed to the formation of S-S bonds in the QHL/ZnO hydrogel.

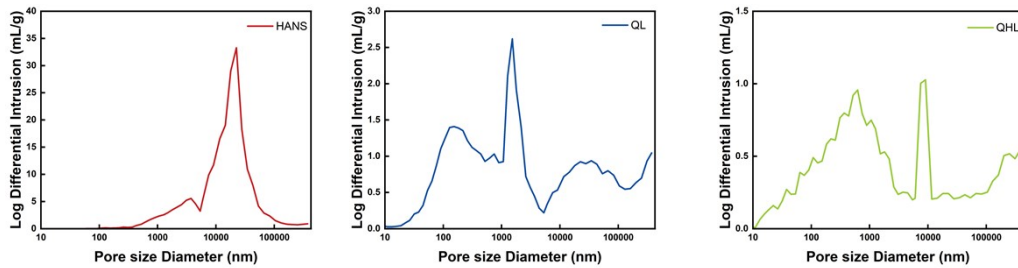

**Fig. S6** Mercury intrusion porosimetry plots showing pore size distribution for different hydrogels.

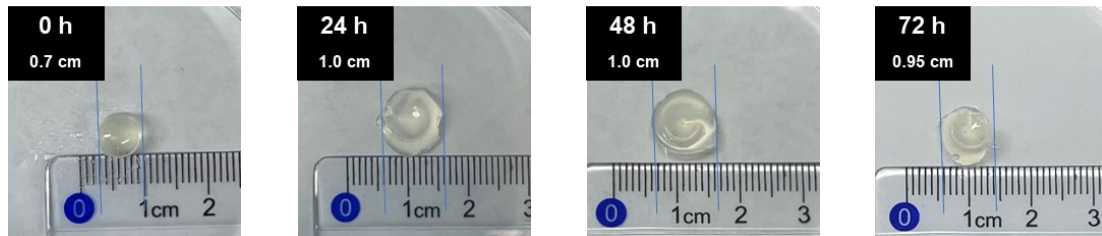

**Fig. S7** Time-dependent morphological changes of QHL/ZnO hydrogel in 1 M HCl solution ( $\text{pH} = 0$ ).

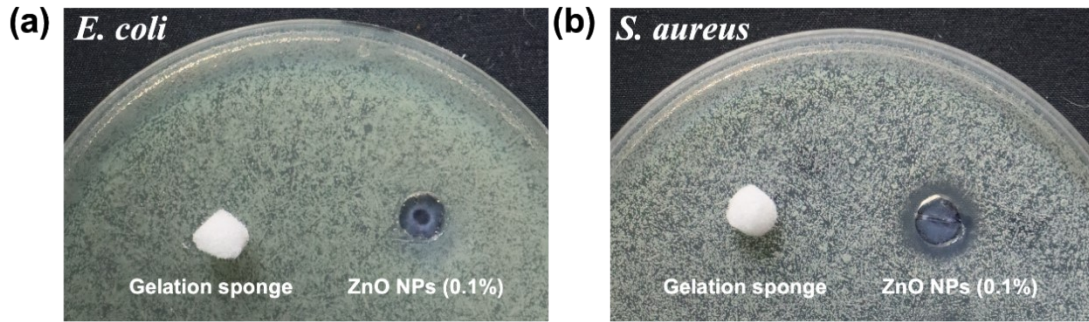

**Fig. S8** The inhibition zone of hydrogels against (a) *E. coli* and (b) *S. aureus*.

Inoculation was performed by adding 100  $\mu\text{L}$  of the hydrogel precursors to sample tubes, with 5 mL and 4.9 mL of the inoculum added to control and sample tubes, respectively, for incubation. After 18 h, the samples were diluted to  $10^2$ ,  $10^3$ , and  $10^4$  times. And 100  $\mu\text{L}$  aliquot of each dilution was spread onto agar plates and incubated for 24 h. Agar plates with dilutions yielding colony counts between 30 and 300 CFU were selected, photographed, and recorded. Bacterial concentration and antibacterial rate were calculated by Eq.3 and Eq.4 (ESI†), respectively.

Calculation of viable bacterial concentration:

$$\text{Bacterial Concentration}(\text{CFU}/\text{mL}) = \frac{\text{Number of Colonies} \times \text{Dilution Factor}}{\text{Volume Plated}(\text{mL})} \quad (\text{Eq.S3})$$

Calculation of antibacterial rate:

$$\text{Antibacterial Rate} = \frac{K_{\text{Control}} - K_{\text{Sample}}}{K_{\text{Control}}} \times 100\% \quad (\text{Eq.S4})$$

**Table S1** Antibacterial rates of hydrogels against *E. coli* and *S. aureus*.

| Samples         | <i>E. coli</i>                   |                        | <i>S. aureus</i>                 |                        |
|-----------------|----------------------------------|------------------------|----------------------------------|------------------------|
|                 | Bacterial concentration (CFU/mL) | Antibacterial rate (%) | Bacterial concentration (CFU/mL) | Antibacterial rate (%) |
| Control         | $2.94 \times 10^5$               | /                      | $2.57 \times 10^5$               | /                      |
| GelMA/HANS      | $2.41 \times 10^5$               | 18%                    | $1.84 \times 10^5$               | 28.4%                  |
| QCSMA/HANS      | $0.11 \times 10^5$               | 96%                    | $0.11 \times 10^5$               | 96%                    |
| QCSMA/HANS /ZnO | 0                                | 99%                    | 0                                | 99%                    |

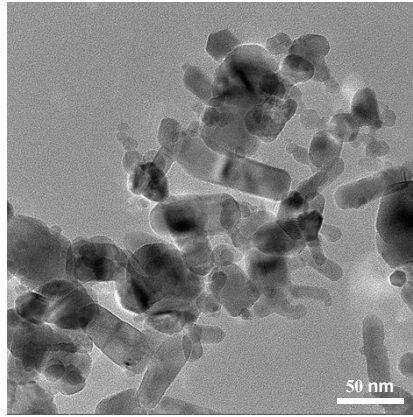

**Fig. S9** TEM image of ZnO NPs.
